# Supplementary material for: Attenuation of encrustation by self-assembled inorganic fullerene-like nanoparticles
Source: Royal Society of Chemistry journal article supplement (doi:10.1039/c3nr06231g), 2014-01-01
Supplement: c3nr06231g1.pdf [file c3nr06231g1.pdf]

# Attenuation of Encrustation by Self-Assembled Inorganic Fullerene-like Nanoparticles

Racheli Ron,<sup>a</sup> David Zbaida,<sup>a</sup> Ilan Z. Kafka<sup>b</sup>, Rita Rosentsveig<sup>a</sup>, Ilan Leibovitch<sup>b,c</sup> and Reshef Tenne<sup>\*a</sup>

5

## Supplementary Information

### 10 Supplementary figures

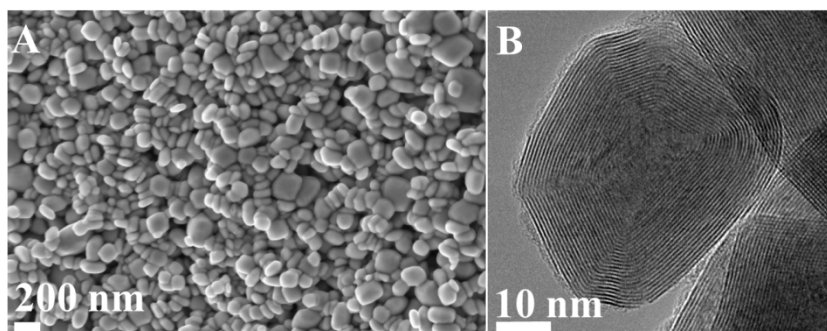

**Fig. S1** Electron microscopy imaging of rhenium-doped inorganic fullerene-like MoS<sub>2</sub> nanoparticles; (A) SEM micrograph of Re:IF-MoS<sub>2</sub> powder. (B) TEM micrograph of an individual Re:IF-MoS<sub>2</sub> nanoparticle.

15

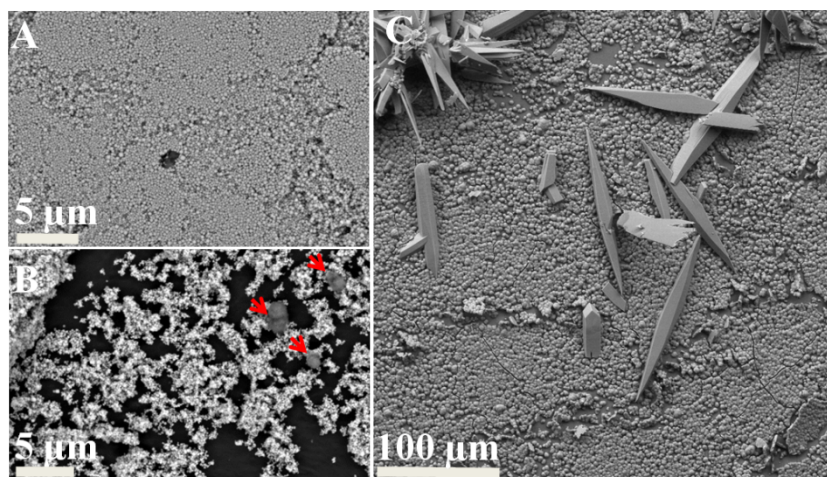

**Fig. S2** SEM (BSE mode) micrographs of encrusted, Re:IF-MoS<sub>2</sub>-coated and uncoated, catheters (both were jointly incubated in the same bath). (A) Surface of a Re:IF-MoS<sub>2</sub>-coated catheter. Encrustation concretions are minor. The imaged domain of the Re:IF-MoS<sub>2</sub> nanoparticles coating displays the closed-pack mosaic-like arrangement of the Re:IF-MoS<sub>2</sub> nanoparticles (mode 1). (B) Another imaged coating domain (BSE mode of the SEM) on the same Re:IF-MoS<sub>2</sub>-coated catheter surface as in (A). Encrustation concretions (red arrows) are clearly distinguished by their darker appearance in comparison to the Re:IF-MoS<sub>2</sub> nanoparticles. The coating domain here contains rather clumped nanoparticles (mode 2). (C) Surface of an uncoated catheter. Encrustation precipitates cover most of the surface by both the elongated and globular encrusted stones.

20

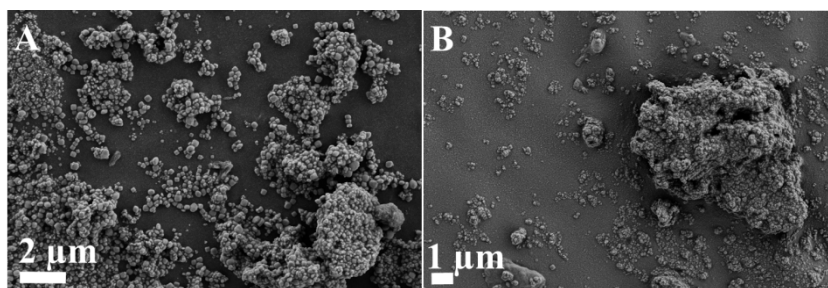

**Fig. S3** SEM micrographs of Re-doped and undoped IF-MoS<sub>2</sub> nanoparticles. (A) A clumped (mode 2) packing of the Re:IF-MoS<sub>2</sub> coating on the surface of a silicone catheter. (B) Typical undoped IF-MoS<sub>2</sub> coating on the silicone catheter.

5

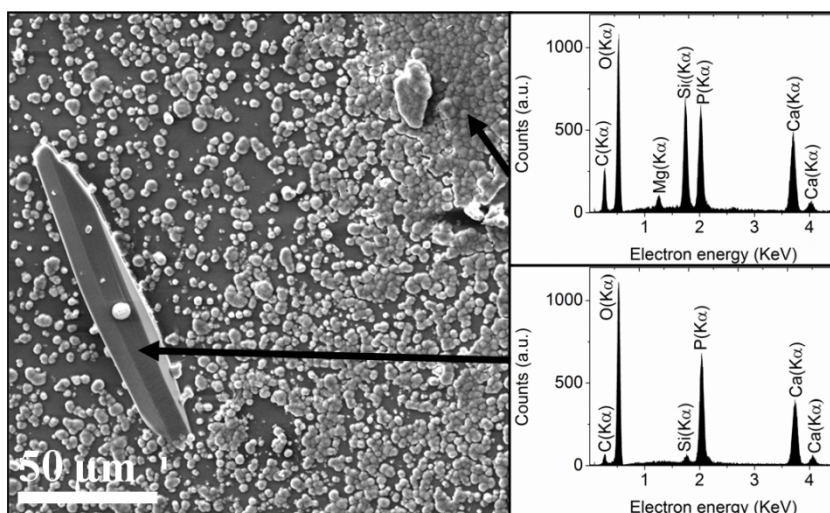

**Fig. S4** EDS spectra of the two *in-vitro* encrustation morphologies. The arrows are directed to the adequate deposit's morphology on the SEM micrograph, from which the spectra were generated.

## 10 Supplementary table

**Table S1** The composition of the synthetic urine.

| Compound                       | Chemical formula                                                                | Concentration [g/L] |
|--------------------------------|---------------------------------------------------------------------------------|---------------------|
| Calcium chloride               | $\text{CaCl}_2 \cdot 2\text{H}_2\text{O}$                                       | 0.49                |
| Magnesium chloride hexahydrate | $\text{MgCl}_2 \cdot 6\text{H}_2\text{O}$                                       | 0.65                |
| Sodium chloride                | $\text{NaCl}$                                                                   | 4.6                 |
| Di-sodium sulphate             | $\text{Na}_2\text{SO}_4$                                                        | 2.3                 |
| Tri-sodium citrate dihydrate   | $\text{HOC}(\text{COONa})(\text{CH}_2\text{COONa})_2 \cdot 2\text{H}_2\text{O}$ | 0.65                |
| Di-sodium oxalate              | $\text{Na}_2\text{C}_2\text{O}_4$                                               | 0.02                |
| Potassium dihydrogen phosphate | $\text{KH}_2\text{PO}_4$                                                        | 2.8                 |
| Potassium chloride             | $\text{KCl}$                                                                    | 1.6                 |
| Ammonium chloride              | $\text{NH}_4\text{Cl}$                                                          | 1.0                 |
| Urea                           | $\text{NH}_2\text{-CO-NH}_2$                                                    | 25                  |
